# Supplementary material
Source: PubMed Central journal article supplement (PMC1851031)
Supplement: pnas_0701631104_1.pdf [file pnas_0701631104_1.pdf]

**Table 1. Set of 35 workable PRIS**

| No. | Chr | Start a * | End a     | Start b   | End b *   | Core, bp | Distance a-b |
|-----|-----|-----------|-----------|-----------|-----------|----------|--------------|
| 1   | 1   | 101866950 | 101867373 | 101907203 | 101907626 | 424      | 39829        |
| 2   | 1   | 177014069 | 177014496 | 177040354 | 177040781 | 428      | 25857        |
| 3   | 1   | 204082818 | 204083393 | 204089868 | 204090443 | 576      | 6474         |
| 4   | 2   | 236984124 | 236984588 | 237011177 | 237011641 | 465      | 26588        |
| 5   | 3   | 21502381  | 21502930  | 21507161  | 21507710  | 550      | 4230         |
| 6   | 3   | 151030383 | 151031267 | 151039203 | 151040087 | 885      | 7935         |
| 7   | 4   | 106476040 | 106476455 | 106480723 | 106481138 | 416      | 4267         |
| 8   | 4   | 191180312 | 191180892 | 191246063 | 191246643 | 581      | 65170        |
| 9   | 5   | 68807142  | 68807613  | 68811947  | 68812418  | 472      | 4333         |
| 10  | 5   | 98901113  | 98901625  | 98948100  | 98948612  | 513      | 46474        |
| 11  | 5   | 168076401 | 168077035 | 168101254 | 168101888 | 635      | 24218        |
| 12  | 5   | 180463293 | 180463850 | 180542634 | 180543191 | 558      | 78783        |
| 13  | 6   | 11122505  | 11122970  | 11127708  | 11128173  | 466      | 4737         |
| 14  | 7   | 106845789 | 106846308 | 106850372 | 106850891 | 520      | 4063         |
| 15  | 7   | 143135872 | 143136736 | 143146483 | 143147347 | 865      | 9746         |
| 16  | 9   | 21357435  | 21357977  | 21430536  | 21431078  | 543      | 72558        |
| 17  | 9   | 34234207  | 34235973  | 34263223  | 34264989  | 1767     | 27249        |
| 18  | 10  | 80762190  | 80762791  | 80767818  | 80768419  | 602      | 5026         |
| 19  | 11  | 300798    | 301533    | 308248    | 308983    | 736      | 6714         |
| 20  | 14  | 60141001  | 60142582  | 60148138  | 60149719  | 1582     | 5555         |
| 21  | 14  | 63401380  | 63401962  | 63406691  | 63407273  | 583      | 4728         |
| 22  | 15  | 43190473  | 43190955  | 43215084  | 43215566  | 483      | 24128        |
| 23  | 16  | 73796077  | 73797039  | 73814720  | 73815682  | 963      | 17680        |
| 24  | 17  | 7411940   | 7412367   | 7441742   | 7442169   | 428      | 29374        |
| 25  | 17  | 18261671  | 18262555  | 18296785  | 18297669  | 885      | 34229        |
| 26  | 17  | 23927564  | 23927986  | 23932442  | 23932864  | 423      | 4455         |
| 27  | 19  | 5561918   | 5562858   | 5599783   | 5600723   | 941      | 36924        |
| 28  | 19  | 54227759  | 54228241  | 54249409  | 54249891  | 483      | 21167        |
| 29  | X   | 47011673  | 47012093  | 47071683  | 47072103  | 421      | 59589        |
| 30  | X   | 49590022  | 49590443  | 49594463  | 49594884  | 422      | 4019         |
| 31  | X   | 50750264  | 50751794  | 50839234  | 50840764  | 1531     | 87439        |
| 32  | X   | 51377567  | 51378137  | 51470676  | 51471246  | 571      | 92538        |
| 33  | X   | 122759827 | 122760265 | 122777030 | 122777468 | 439      | 16764        |
| 34  | X   | 153438545 | 153439423 | 153516192 | 153517070 | 879      | 76768        |
| 35  | X   | 153450245 | 153451123 | 153527892 | 153528770 | 879      | 76768        |

\*Starts and ends of cores are indicated according to NCBI Build 36 of the respective chromosome (Chr).
