# Supplementary material
Source: PubMed Central journal article supplement (PMC1851031)
Supplement: pnas_0701631104_2.pdf [file pnas_0701631104_2.pdf]

**Table 2. RKits PCR primers**

| S* | R <sup>†</sup> | Forward primers           |                       | Reverse primers             |                       | Product size, bp |
|----|----------------|---------------------------|-----------------------|-----------------------------|-----------------------|------------------|
|    |                | Sequence                  | Location <sup>‡</sup> | Sequence                    | Location <sup>‡</sup> |                  |
|    |                |                           |                       | IR-1                        |                       |                  |
| A  | 1              | GGCACGAGAGGGAGATTCTTA     | 5561109               | GAGAATGGGACAGACTGTTATCACTAG | 5563781               | 2699             |
| A  | 2              | CCAATCCCAACTGCTGACTTAAG   | 5561205               | GAGAATGGGACAGACTGTTATCACTAG | 5563781               | 2603             |
| B  | 1              | CCACAGAGGGACATGAGCTTAC    | 5598351               | GCACTGTTTCTCTTCCACGTATAG    | 5601329               | 3003             |
| B  | 2              | CCACAGAGGGACATGAGCTTAC    | 5598351               | GCACCAAATCAGCCTGTTAACTC     | 5601174               | 2846             |
| C  | 1              | GGCACGAGAGGGAGATTCTTA     | 5561109               | CCACAGAGGGACATGAGCTTAC      | 5598351               | 3182             |
| C  | 2              | CCAATCCCAACTGCTGACTTAAG   | 5561205               | GAGATGAAGGAGGGAGGGTATTTAC   | 5598524               | 2876             |
| D  | 1              | CCGGAGGGACTTCATTACAAG     | 5562176               | CTCTGTGTAGCTAGCAGTTCTCTTC   | 5562737               | 531              |
|    |                |                           |                       | IR-2                        |                       |                  |
| A  | 1              | GAGCTGGAGAGATTTCCCTACTAAG | 43189734              | GGAGACCAGTGGGGTTGATCTG      | 43192008              | 2296             |
| A  | 2              | GAGCTGGAGAGATTTCCCTACTAAG | 43189734              | CCCATTATAGCTCTTGGGAACTG     | 43191781              | 2070             |
| B  | 1              | CCAAACTGTCAACGACAACAGC    | 43214376              | ACTTGAGTTCCGATTGATGACC      | 43217438              | 3084             |
| B  | 2              | CCAAACTGTCAACGACAACAGC    | 43214376              | GACTTTTGGAAAGGTCCCATCTAC    | 43217238              | 2885             |
| C  | 1              | GTCCCAGACTCTTTGAACTGTTG   | 43189216              | CATTCTCACACAGGAGCTCAGAAC    | 43213341              | 3481             |
| C  | 2              | GAGCTGGAGAGATTTCCCTACTAAG | 43189734              | CCTTATCCTTACCCCTCCTACC      | 43213609              | 2694             |
| D  | 1              | CTGGAACAGCTCCTCGTCTC      | 43190633              | CAGAACCCCTGCTCATGTG         | 43190923              | 290              |
|    |                |                           |                       | IR-3                        |                       |                  |
| A  | 1              | GGGAACTGGTTCATTTAGTCAGTC  | 151028613             | CTGGCTGGTACACATGATTATCTG    | 151032999             | 4410             |
| A  | 2              | GGCGCTGAGAGATTTGTGATATAC  | 151029382             | CACTGGTTCTGAAGCTACATTCTTG   | 151032701             | 3344             |
| B  | 1              | GCCTTCTGAAAAGATCACTGAAGA  | 151037651             | GCCTTTAGCTCTCACTTCAAGTTTAC  | 151040519             | 2894             |
| B  | 2              | GCCTTCTGAAAAGATCACTGAAGA  | 151037651             | GCCTTTAGCTCTCACTTCAAGTTTAC  | 151040519             | 2894             |
| C  | 1              | CTGGCTGGTACACATGATTATCTG  | 151032999             | GGCCTACCATTTGACATAATTCTAC   | 151040693             | 3270             |
| C  | 2              | CACTGGTTCTGAAGCTACATTCTTG | 151032701             | GCCTTTAGCTCTCACTTCAAGTTTAC  | 151040519             | 2806             |
| D  | 1              | GTTCTCCTGCACATGCTCTCTTG   | 151030425             | GCAATTAACATTTGGCTCCTC       | 151031206             | 981              |

\* S, structure: A, a core; B, b core; C, inverted structure; D, hybridization probe

<sup>†</sup> R, reaction: 1, primers PCR; 2, secondary PCR

<sup>‡</sup> The location of the 5' end is indicated according to NCBI Build 36 in the corresponding chromosomes: IR-1, chromosome 19; IR-2, chromosome 15; IR-3, chromosome 3.
